# Supplementary material for: Water-compatible surface molecularly imprinted polymers with synergy of bi-functional monomers for enhanced selective adsorption of bisphenol A from aqueous solution
Source: Royal Society of Chemistry journal article supplement (doi:10.1039/c5en00198f), 2016-01-01
Supplement: c5en00198f1.pdf [file c5en00198f1.pdf]

Electronic Supplementary Material (ESI) for Environmental Science: Nano.  
This journal is © The Royal Society of Chemistry 2015

## Supplementary information for

# **Water-compatible surface molecularly imprinted polymers with synergy of bi-functional monomers for enhanced selective adsorption of bisphenol A from aqueous solution**

*Feifei Duan,<sup>a, b, c</sup> Chaoqiu Chen,<sup>b</sup> Xiaofeng Zhao,<sup>a, c</sup> Yongzhen Yang,<sup>a, d</sup> Xuguang Liu,<sup>a, c\*</sup> and Yong Qin<sup>b\*</sup>*

*<sup>a</sup>Key Laboratory of Interface Science and Engineering in Advanced Materials  
(Taiyuan University of Technology), Ministry of Education, Taiyuan 030024, China.*

*<sup>b</sup>State Key Laboratory of Coal Conversion, Institute of Coal Chemistry, Chinese  
Academy of Sciences, Taiyuan 030001, China.*

*<sup>c</sup>College of Chemistry and Chemical Engineering, Taiyuan University of Technology,  
Taiyuan 030024, China.*

*<sup>d</sup>Research Center on Advanced Materials Science and Technology, Taiyuan  
University of Technology, Taiyuan 030024, China*

**Synthesis of porous graphene oxides (PGO).** Graphene oxide was synthesized via Staudenmaier method. PGO was prepared by the method of Zhao's group.<sup>1</sup> Briefly, hard templates, silica nanospheres were synthesized by Stober method: ammonia solution (3 mL, 25%), distilled water (1 mL) and tetraethyl orthosilicate (2.3 mL) were mixed into 60 mL of ethanol. The mixed solution was reacted under vigorous stirring for 6 h at 25 °C. Then the solution was dialyzed for 48 h and then diluted to 75 mL with water. F108 (0.6 g), 1, 3, 5-trimethylbenzene (0.875 mL) and concentrated HCl (15 mL, 37%) were added into the diluted suspension and the reaction was continued for 48 h. Then ammonia solution was used to neutralize the suspension. Graphene oxide suspension (600 mL, 1.0 mg/mL) was mixed into the neutralized solution and the whole mixture was stirred for 12 h at room temperature. Then, the produced solid precipitate was collected by centrifugation at 4500 r.min<sup>-1</sup> and dried at 50 °C. The dried precipitate was calcined at 400 °C for 1 h under argon atmosphere. The sample was then washed by HF solution (5 wt%) three times to remove the silica template and PGO was obtained.

**Adsorption capacity.** The adsorption capacity of adsorbent (mg/g) at equilibrium  $q_e$  was calculated according to the following equation:

$$q_e = \frac{C_0 - C_e}{m}V \quad (1)$$

where  $C_0$  and  $C_e$  present the initial and equilibrium concentrations of BPA in the mixture solution (mg/L), respectively,  $V$  is the volume of solution (L), and  $m$  is the mass of adsorbent used (g).

**Characterization.** The morphologies of the parent PGO and functionalized PGO were characterized by transmission electron microscopy (TEM, JEOL-2100F). X-Ray energy dispersive spectroscopy (EDS) was used to obtain information about the chemical composition of the samples. Fourier-transform IR (FTIR) spectra were recorded on a Japan MODEL-8400s FTIR spectrometer using KBr pellet. Thermogravimetric (TG) analysis was carried out on a Netzsch TG 209 F3 instrument at a heating rate of 10°C/min under air atmosphere.

**Table S1** The detailed monomer doses of MIPs with different monomer ratio (molar ratio).

| AMPS:St<br>Monomer | 5:0    | 4:1    | 3:2    | 2.5:2.5 | 2:3    | 1:4    | 0:5   |
|--------------------|--------|--------|--------|---------|--------|--------|-------|
| AMPS (g)           | 0.8320 | 0.6656 | 0.4992 | 0.4160  | 0.3328 | 0.1664 | -     |
| St (μL)            | -      | 92.0   | 184.0  | 230.0   | 276.0  | 368.0  | 460.0 |

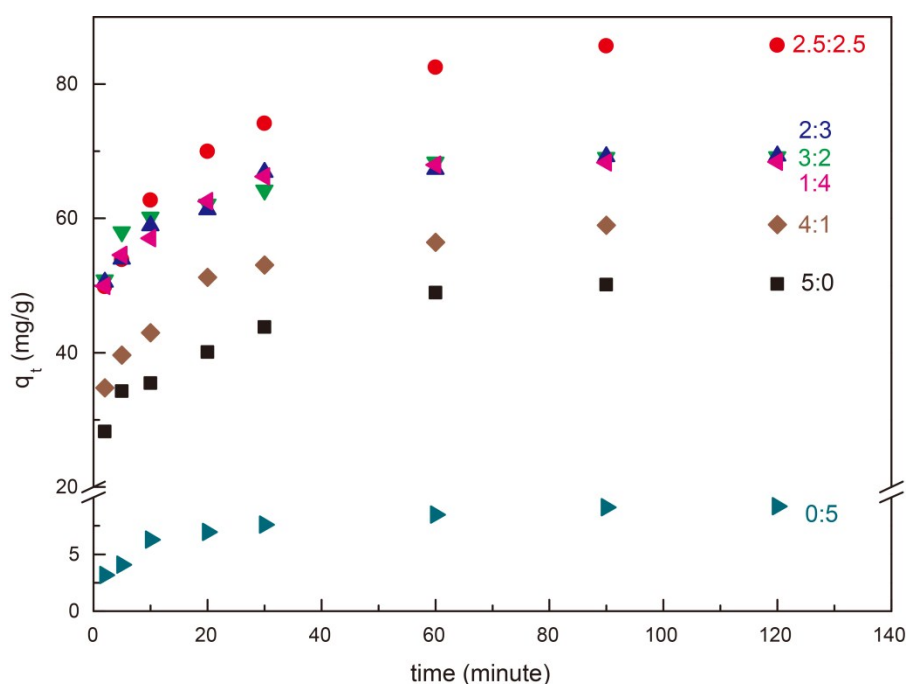

**Fig. S1** Effect of contact time on the adsorption of MIPs with different molar ratio of AMPS to St (20 mg of each MIPs in 40 mL of 50 mg/L BPA solution at 293 K).

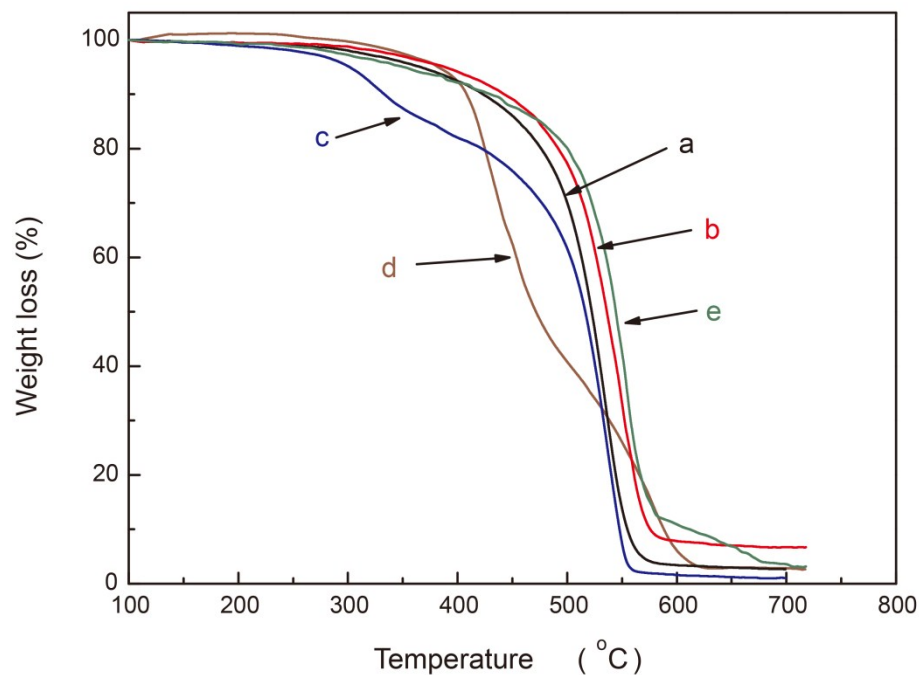

**Fig. S2** TG curves of (a) PGO, (b) silanized PGO, (c) AMPS/MIPs, (d) St/MIPs and (e) AMPS-St/MIPs.

### Adsorption kinetics studies of AMPS-St/MIPs

Two conventional kinetics models (pseudo-first-order and pseudo-second-order) were applied to analyze the experimental data.

The pseudo-first-order model can be described as:

$$\ln(q_e - q_t) = \ln q_e - k_1 t \quad (2)$$

where  $k_1$  is the rate constant of the pseudo-first-order model of adsorption (1/min),  $q_e$  and  $q_t$  (mg/g) are the adsorbed BPA amounts on AMPS-St/MIPs at equilibrium and at

various times  $t$ , respectively. The values of  $q_e$  and  $k_1$  can be determined from the intercept and slope of the linear plot of  $\ln(q_e - q_t)$  versus  $t$ .

The pseudo-second-order model comprises all the steps of adsorption including external film diffusion, adsorption, and internal particle diffusion, which is described as:

$$\frac{t}{q_t} = \frac{1}{k_2 q_e^2} + \frac{t}{q_e} \quad (3)$$

where  $q_e$  and  $q_t$  are defined as in the above pseudo-first-order model and  $k_2$  (mg/mg·min) is the rate constant of the pseudo-second-order model of adsorption, which can be obtained from the linear plot of  $t/q_t$  versus  $t$ .

The kinetic parameters and correlation coefficients of BPA adsorption by AMPS-St/MIPs are fitted with the above two models under three different temperatures by nonlinear regression and summarized in Table S2.

**Table S2** Kinetic parameters for the adsorption of BPA by AMPS-St/MIPs

| temperature | $q_{e,exp}$<br>(mg/g) | pseudo-first-order |                       |        | pseudo-second-order |                       |        |
|-------------|-----------------------|--------------------|-----------------------|--------|---------------------|-----------------------|--------|
|             |                       | $K_1$<br>(1/min)   | $q_{e,cal}$<br>(mg/g) | $R^2$  | $K_2$<br>(1/min)    | $q_{e,cal}$<br>(mg/g) | $R^2$  |
| 293K        | 85.7                  | 0.3366             | 77.17                 | 0.5688 | 0.00573             | 82.75                 | 0.9576 |
| 298K        | 75.5                  | 0.1922             | 70.01                 | 0.7023 | 0.00367             | 74.27                 | 0.9847 |
| 303K        | 69.6                  | 0.1502             | 65.14                 | 0.7911 | 0.00315             | 68.31                 | 0.9889 |

### Adsorption isotherm and thermodynamic studies of AMPS-St/MIPs

Two commonly used models, the Langmuir and Freundlich models were adopted to describe the adsorption isotherms of BPA on AMPS-St/MIPs.

The Langmuir model, which assumes the adsorption takes place on a homogeneous surface with monolayer coverage and uniform energies, is expressed as:<sup>2-4</sup>

$$\frac{C_e}{q_e} = \frac{1}{q_m} C_e + \frac{1}{q_m K_L} \quad (4)$$

where  $q_e$  represents the amount of adsorbed BPA on AMPS-St/MIPs (mg/g),  $C_e$  is the equilibrium concentration of BPA in solution (mg/L),  $q_m$  is the maximum adsorption capacity of the adsorbent (mg/g), and  $K_L$  is the Langmuir constant (L/mg), which is related to the affinity of the binding sites. The values of  $q_m$  and  $K_L$  are determined from the slope and intercept of the linear plot of  $C_e/q_e$  against  $C_e$ .

Freundlich model is an empirical model based on multilayer adsorption on a heterogeneous surface. The equation of Freundlich model is given as follows:<sup>5, 6</sup>

$$\ln q_e = \frac{1}{n} \ln C_e + \ln K_F \quad (5)$$

where  $q_e$  and  $C_e$  are defined the same as in the Langmuir model, and  $K_F$  and  $n$  are the Freundlich constants related to adsorption capacity and adsorption intensity, respectively. If  $n > 1$ , suggesting favorable adsorption, then adsorption capacity increases.  $K_F$  and  $n$  can be calculated by a linear plot of  $\ln q_e$  versus  $\ln C_e$ . The corresponding parameters calculated according to the Langmuir and Freundlich models are listed in Table S3.

**Table S3** Isotherm parameters for the adsorption of BPA by AMPS-St/MIPs.

| temperature | Langmuir           |                    |       | Freundlich |     |       |
|-------------|--------------------|--------------------|-------|------------|-----|-------|
|             | $q_m(\text{mg/g})$ | $K_L(\text{L/mg})$ | $R^2$ | $K_F$      | $n$ | $R^2$ |

|      |       |         |        |         |        |         |
|------|-------|---------|--------|---------|--------|---------|
| 293K | 84.06 | 0.05369 | 0.9893 | 10.8740 | 1.4847 | 0.9952  |
| 298K | 73.64 | 0.05021 | 0.9849 | 9.4046  | 1.5472 | 0.99672 |
| 303K | 67.33 | 0.03798 | 0.9738 | 7.5155  | 1.6782 | 0.9995  |

The  $\Delta G^\circ$ ,  $\Delta H^\circ$  and  $\Delta S^\circ$  are calculated from the following equations:

$$\Delta G^\circ = -RT \ln K^\circ \quad (6)$$

$$\ln K^\circ = \frac{\Delta S^\circ}{R} - \frac{\Delta H^\circ}{RT} \quad (7)$$

$$K_d = \frac{C_0 - C_e}{C_e} \frac{V}{m} \quad (8)$$

where  $R$  is the universal gas constant (8.314 J/K•mol),  $T$  is the absolute temperature (K),  $K_d$  is the distribution adsorption coefficient (g/L),  $C_0$  is the initial concentration (mmol/L),  $C_e$  is the equilibration concentration of BPA in solution (mmol/L),  $V$  is the volume of the solution (L), and  $m$  is the mass of the adsorbent (g). The adsorption equilibrium constant,  $K^\circ$ , can be calculated by plotting  $\ln K_d$  versus  $C_e$  and extrapolating  $C_e$  to zero. The value of the intercept is  $\ln K^\circ$ . The thermodynamic parameters calculated from equations (6)-(8) at three different temperatures are listed in Table S5

**Table S4** Thermodynamic parameters of BPA adsorption on AMPS-St/MIPs.

| Thermodynamic constant | T(K) |     |     |
|------------------------|------|-----|-----|
|                        | 293  | 298 | 303 |

|                            |       |        |       |
|----------------------------|-------|--------|-------|
| $\ln K^\circ$              | 3.092 | 2.835  | 2.767 |
| $\Delta G^\circ$ (kJ/mol)  | -7.39 | -7.02  | -6.97 |
| $\Delta H^\circ$ (kJ/mol)  |       | -24.06 |       |
| $\Delta S^\circ$ (J/mol•K) |       | -56.68 |       |

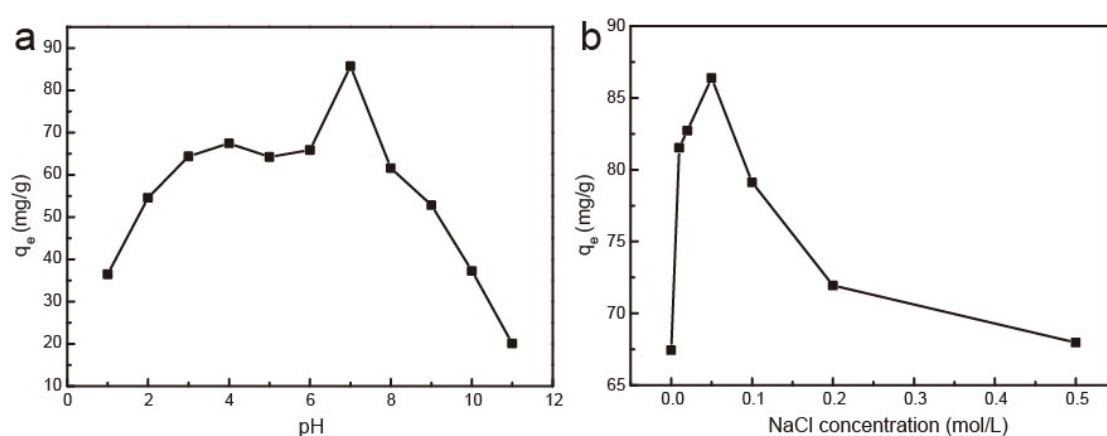

**Fig. S3** (a) Effect of the solution pH (20 mg, BPA concentration: 50 mg/L, volume: 40 mL, adsorption time: 1.5 h, temperature: 293 K); (b) Effect of ionic strength (20 mg, BPA concentration: 50 mg/L, volume: 40 mL, adsorption time: 1.5 h, temperature: 293 K, pH 6.0) on the BPA adsorption by AMPS-St/MIPs.

## REFERENCES

- Huang, X.; Qian, K.; Yang, J.; Zhang, J.; Li, L.; Yu, C.; Zhao, D., *Functional nanoporous graphene foams with controlled pore sizes*. *Advanced Materials*, 2012, **24** (32), 4419-4423.
- Deng, H.; Gao, L.; Zhang, S.; Yuan, J., *Preparation of a Copper Ion Selective Membrane by Surface-Modified Molecular Imprinting*. *Industrial & Engineering Chemistry Research*, 2012, **51** (43), 14018-14025.
- Luo, J.; Jiang, S.; Liu, X., *Efficient one-pot synthesis of mussel-inspired molecularly imprinted polymer coated graphene for protein-specific recognition and fast separation*. *The Journal of Physical Chemistry C*, 2013, **117** (36), 18448-18456.
- Zhou, J.; Tang, C.; Cheng, B.; Yu, J.; Jaroniec, M., *Rattle-type carbon-alumina core-shell spheres: synthesis and application for adsorption of organic dyes*. *ACS applied materials & interfaces*, 2012, **4** (4), 2174-2179.
- Wang, X.; Pan, J.; Guan, W.; Dai, J.; Zou, X.; Yan, Y.; Li, C.; Hu, W., *Selective removal of 3-chlorophenol from aqueous solution using surface molecularly imprinted microspheres*. *Journal of Chemical & Engineering Data*, 2011, **56** (6), 2793-2801.



6. He, X.; Male, K.B.; Nesterenko, P.N.; Brabazon, D.; Paull, B.Luong, J.H., *Adsorption and desorption of methylene blue on porous carbon monoliths and nanocrystalline cellulose*. ACS applied materials & interfaces, 2013, **5** (17), 8796-8804.
